# Supplementary material
Source: Springer Nature journal article supplement (https://www.springermedizin.de/resource/supplementary/13256_2007_538_MOESM1_ESM.pdf/9646206)

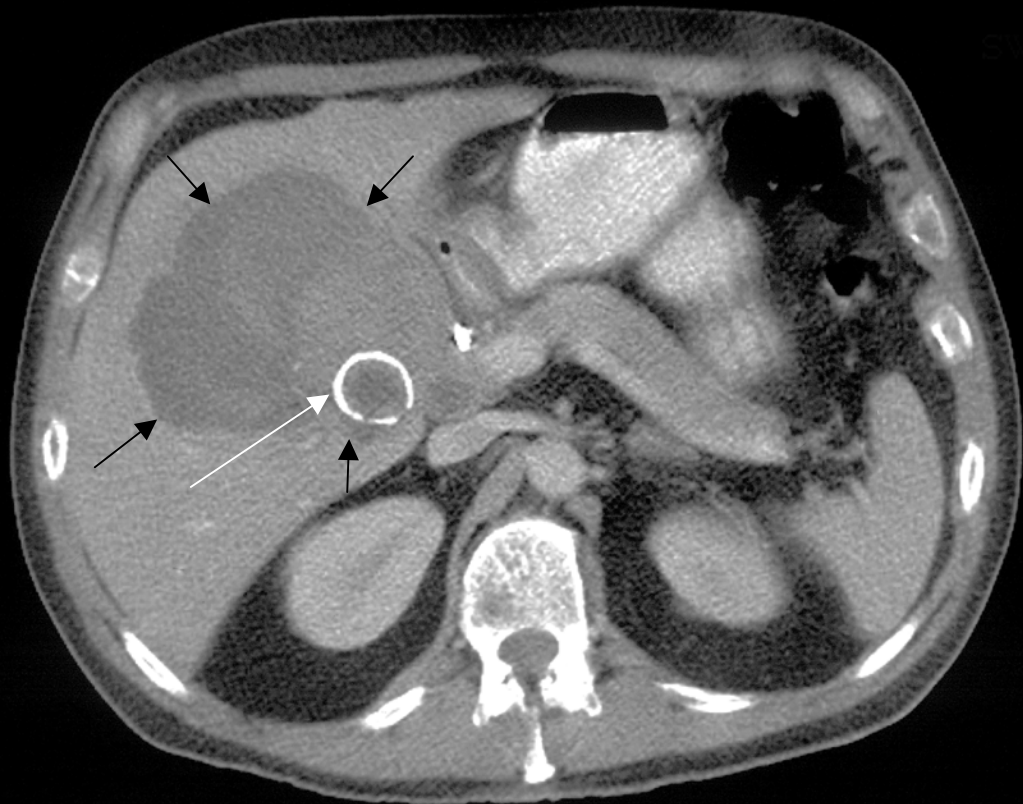

10  
cm

Supplement: MOESM1 [file 9646206]
